# Supplementary material for: Deep-blue high-efficiency triplet–triplet annihilation organic light-emitting diodes using hydroxyl-substituted tetraphenylimidazole-functionalized anthracene fluorescent emitters
Source: Royal Society of Chemistry journal article supplement (doi:10.1039/d2tc01406h), 2022-01-01

## Supporting Information

### Deep-blue high-efficiency triplet-triplet annihilation organic light-emitting diodes using hydroxyl-substituted tetraphenylimidazole-functionalized anthracene fluorescent emitter

Wan Li,<sup>a</sup> Pongsakorn Chasing,<sup>a</sup> Phattananawee Nalaoh,<sup>a</sup> Thanyarat Chawanpunyawat,<sup>a</sup> Nuttapong Chantanop,<sup>a</sup> Chattarika Sukpattanacharon,<sup>b</sup> Nawee Kungwan,<sup>b</sup> Praweena Wongkaew,<sup>c</sup> Taweesak Sudyoadsuk<sup>a</sup> and Vinich Promarak<sup>\*ac</sup>

<sup>a</sup>Department of Materials Science and Engineering, School of Molecular Science and Engineering, Vidyasirimedhi Institute of Science and Technology, Wangchan, Rayong 21210, Thailand.

E-mail: [vinich.p@vistec.ac.th](mailto:vinich.p@vistec.ac.th)

<sup>b</sup>Department of Chemistry, Faculty of Science, Chiang Mai University, Amphur Muang, Chiang Mai 50200, Thailand.

<sup>c</sup>Research Network of NANOTEC-VISTEC on Nanotechnology for Energy, Vidyasirimedhi Institute of Science and Technology, Wangchan, Rayong 21210, Thailand.

---

#### Synthesis and characterization

**9,10-Bis(4-bromophenyl)anthracene (2):** A mixture of **1** (1.00 g, 2.32 mmol), 1-bromo-4-iodobenzene (1.51 g, 5.34 mmol), Pd(PPh<sub>3</sub>)<sub>4</sub> (135 mg, 0.12 mmol), 2M sodium carbonate (4.90 g, 46.27 mmol) aqueous solution and anhydrous THF (40 mL) was degassed with nitrogen for 15 min while stirring. Then the stirring reaction was heated and refluxed under nitrogen atmosphere for 36 h. The mixture was cooled to room temperature after confirming consumption of the starting materials by TLC in 10% v/v dichloromethane-hexane. Then the mixture was added with brine (20 mL) and extracted with a certain amount of dichloromethane, then dried over anhydrous sodium sulfate and filtered. The extract was concentrated under reduced pressure and finally purified by silica gel column chromatography eluting with 10% v/v dichloromethane-hexane to get white solids (795 mg, 70%). <sup>1</sup>H NMR (600 MHz, CDCl<sub>3</sub>) δ 7.75 (d, J = 8.2 Hz, 4H), 7.67 (dd, J = 6.8, 3.3 Hz, 4H), 7.39-7.33 (m, 8H). <sup>13</sup>C NMR (151 MHz, CDCl<sub>3</sub>) δ 137.88, 136.00, 133.00, 131.74, 129.74, 126.69, 125.39, 121.86. HSMS (APCI): m/z calcd for C<sub>26</sub>H<sub>16</sub>Br<sub>2</sub> (M<sup>+</sup>): 487.9598, found: 489.0103 (MH<sup>+</sup>).

**3-(4-(10-(4-Bromophenyl)anthracen-9-yl)phenyl)-9-phenyl-9H-carbazole (3):** A mixture of **2** (2.50 g, 5.12 mmol), (9-phenyl-9H-carbazol-3-yl)boronic acid (490 mg, 1.71 mmol), Pd(PPh<sub>3</sub>)<sub>4</sub> (39 mg, 0.03 mmol), 2M aqueous solution of sodium carbonate (10 mL) and anhydrous THF (40 mL) was degassed with nitrogen for 15 min while stirring. Then the stirring reaction was heated and refluxed under nitrogen atmosphere for 12 h. The mixture was cooled to room temperature after confirming consumption of the starting materials by TLC in 10% v/v dichloromethane-hexane. Then the mixture was added with brine (20 mL) and extracted with a certain amount of dichloromethane, then dried over anhydrous sodium sulfate and filtered. The extract was concentrated under reduced pressure and finally purified by silica gel column chromatography eluting with 10% v/v dichloromethane-hexane to get white solids (800 mg, 72%). <sup>1</sup>H NMR (600 MHz, CDCl<sub>3</sub>) δ 8.55 (s, 1H), 8.25 (d, J = 7.2 Hz, 1H), 7.97 (d, J = 8.4 Hz, 2H), 7.88-7.82 (m, 3H), 7.76 (d, J = 7.8 Hz, 2H), 7.70-7.67 (m, 2H), 7.67-7.63 (m, 4H), 7.59 (d, J = 7.8 Hz, 2H), 7.56 (d, J = 8.4 Hz, 1H), 7.53-7.50 (m, 1H), 7.48-

7.44 (m, 2H), 7.41-7.37 (m, 6H), 7.38 - 7.33 (m, 1H). <sup>13</sup>C NMR (151 MHz, CDCl<sub>3</sub>) δ 139.55, 139.28, 138.67, 136.21, 135.81, 135.58, 135.19, 133.62, 131.19, 129.86, 129.81, 128.09, 128.07, 127.92, 125.69, 125.37, 125.33, 125.24, 124.69, 124.32, 123.59, 123.45, 123.22, 122.14, 121.65, 119.86, 118.49, 118.27, 117.00, 108.28, 108.11. HSMS (APCI): m/z calcd for C<sub>44</sub>H<sub>28</sub>BrN (M<sup>+</sup>): 649.1405, found: 650.1385 (MH<sup>+</sup>).

**9-Phenyl-3-(4-(10-(4-(4,4,5,5-tetramethyl-1,3,2-dioxaborolan-2-yl)phenyl)anthracen-9-yl)phenyl)-9H-carbazole (4):** A mixture of **3** (500 mg, 0.77 mmol), bis(pinacolato)diboron (587 mg, 2.31 mmol), KOAc (906 mg, 9.25 mmol), and Pd(dppf)<sub>2</sub>Cl<sub>2</sub>·CH<sub>2</sub>Cl<sub>2</sub> (31 mg, 0.32 mmol) were mixed followed by adding 30 mL anhydrous Toluene. The mixture was degassed with nitrogen for 15 min while stirring. Then the stirring reaction was heated and refluxed under nitrogen atmosphere for 15 h. The mixture was cooled to room temperature after confirming consumption of the starting materials by TLC in 30% v/v dichloromethane-hexane. Then the mixture was added with brine (20 mL) and extracted with a certain amount of dichloromethane, then dried over anhydrous sodium sulfate and filtered. The extract was concentrated under reduced pressure and finally purified by silica gel column chromatography eluting with 30% v/v dichloromethane-hexane to get white solids (419 mg, 78%). <sup>1</sup>H NMR (600 MHz, CDCl<sub>3</sub>) δ 8.55 (s, 1H), 8.25 (d, J = 7.2 Hz, 1H), 8.07 (d, J = 7.2 Hz, 2H), 7.97 (d, J = 7.2 Hz, 2H), 7.88-7.82 (m, 3H), 7.71 (d, J = 8.4 Hz, 2H), 7.68-7.63 (m, 4H), 7.60 (d, J = 7.2 Hz, 2H), 7.57-7.49 (m, 4H), 7.48-7.43 (m, 2H), 7.35 (dt, J = 20.4, 6.6 Hz, 5H), 1.44 (s, 12H). <sup>13</sup>C NMR (151 MHz, CDCl<sub>3</sub>) δ 142.28, 141.46, 141.09, 140.56, 137.74, 137.28, 137.07, 137.01, 134.81, 133.16, 131.82, 130.84, 129.99, 129.96, 129.76, 127.57, 127.25, 127.14, 127.09, 126.97, 126.19, 125.51, 125.07, 125.04, 124.04, 123.57, 120.40, 120.16, 118.90, 110.17, 109.99, 83.97, 24.99. HSMS (APCI): m/z calcd for C<sub>50</sub>H<sub>40</sub>BNO<sub>2</sub> (M<sup>+</sup>): 697.3125, found: 698.2077 (MH<sup>+</sup>).

**4-Bromo-2-(1,4,5-triphenyl-1H-imidazol-2-yl)phenol (6) & 2-(3-Bromophenyl)-1,4,5-triphenyl-1H-imidazole (7):** A mixture of **5** (500 mg, 2.38 mmol) and 5-bromosalicylaldehyde (478 mg, 2.38 mmol) or 3-bromobenzaldehyde (440 mg, 2.38 mmol) were mixed at room temperature followed by adding 30 mL of acetic acid. Aniline of 1.022 g/mL (0.33 mL, 3.57 mmol or 0.33 mL, 3.60 mmol) was then added to this solution drop by drop, and ammonium acetate (917 mg, 11.9 mmol or 925 mg, 12 mmol) was added subsequently. The mixture was heated at 110 °C for 12 h under nitrogen atmosphere and reflux device. After termination of the reaction, the dark solution was poured into a copious amount of water in a 1000 mL beaker. Then a certain amount of sodium hydrogen carbonate was added to the mixture until neutralizing. The crude product was purified by recrystallization in dichloromethane.

**6** as white solids (678 mg, 61%). <sup>1</sup>H NMR (600 MHz, CDCl<sub>3</sub>) δ 7.57-7.53 (m, 2H), 7.47-7.40 (m, 3H), 7.32-7.22 (m, 7H), 7.22-7.14 (m, 5H), 6.98 (d, J = 8.4 Hz, 1H), 6.62 (s, 1H). <sup>13</sup>C NMR (151 MHz, CDCl<sub>3</sub>) δ 157.39, 143.44, 136.23, 134.83, 132.91, 132.05, 131.27, 130.80, 129.80, 129.67, 129.12, 129.01, 128.78, 128.60, 128.43, 128.42, 127.48, 127.10, 119.57, 114.22, 109.76. HSMS (APCI): m/z calcd for C<sub>27</sub>H<sub>19</sub>BrN<sub>2</sub>O (M<sup>+</sup>): 466.0681, found: 467.0786 (MH<sup>+</sup>).

**7** as white solids (848 mg, 79%). <sup>1</sup>H NMR (600 MHz, CDCl<sub>3</sub>) δ 7.72 (s, 1H), 7.59 (d, J = 7.2 Hz, 2H), 7.39 (d, J = 7.8 Hz, 1H), 7.35-7.18 (m, 10H), 7.13 (d, J = 7.2 Hz, 2H), 7.08-7.02 (m, 3H). <sup>13</sup>C NMR (151 MHz, CDCl<sub>3</sub>) δ 145.27, 138.58, 136.81, 134.23, 132.49, 131.92, 131.33, 131.21, 131.10, 130.39, 129.47, 129.25, 128.58, 128.40, 128.38, 128.22, 128.12, 127.38, 127.17, 126.76, 122.29. HSMS (APCI): m/z calcd for C<sub>27</sub>H<sub>19</sub>BrN<sub>2</sub> (M<sup>+</sup>): 450.0732, found: 451.0560 (MH<sup>+</sup>).

All crystallographic information (CIF) data including CCDC numbers of 2017513 and 2051106 for HO-PIAC and PIAC, respectively, were deposited on and can be obtained with no cost at <https://www.ccdc.cam.ac.uk/>.

**Table S1.** Crystallographic data

| Compound name                                                   | HO-PIAC                                                                          | PIAC                                                                            |
|-----------------------------------------------------------------|----------------------------------------------------------------------------------|---------------------------------------------------------------------------------|
| CCDC number                                                     | 2017513                                                                          | 2051106                                                                         |
| Empirical formula                                               | C <sub>72</sub> H <sub>48</sub> Cl <sub>3</sub> N <sub>3</sub> O                 | C <sub>71</sub> H <sub>47</sub> N <sub>3</sub>                                  |
| Formula weight                                                  | 1077.48                                                                          | 942.11                                                                          |
| Temperature/K                                                   | 100                                                                              | 100                                                                             |
| Crystal system                                                  | triclinic                                                                        | monoclinic                                                                      |
| Space group                                                     | <i>P</i> -1                                                                      | <i>C</i> 2/ <i>c</i>                                                            |
| <i>a</i> /Å                                                     | 9.8323(5)                                                                        | 41.3796(13)                                                                     |
| <i>b</i> /Å                                                     | 15.2021(8)                                                                       | 8.3576(3)                                                                       |
| <i>c</i> /Å                                                     | 19.9693(11)                                                                      | 30.6626(9)                                                                      |
| $\alpha$ /°                                                     | 71.560(2)                                                                        | 90                                                                              |
| $\beta$ /°                                                      | 88.608(2)                                                                        | 100.697(2)                                                                      |
| $\gamma$ /°                                                     | 74.215(2)                                                                        | 90                                                                              |
| Volume/Å <sup>3</sup>                                           | 2718.6(3)                                                                        | 10419.9(6)                                                                      |
| <i>Z</i>                                                        | 2                                                                                | 8                                                                               |
| $\rho_{\text{calc}}$ /g/cm <sup>3</sup>                         | 1.316                                                                            | 1.201                                                                           |
| $\mu$ /mm <sup>-1</sup>                                         | 0.219                                                                            | 0.532                                                                           |
| F(000)                                                          | 1120.0                                                                           | 3952.0                                                                          |
| Crystal size/mm <sup>3</sup>                                    | 0.42 × 0.05 × 0.02                                                               | 0.57 × 0.23 × 0.09                                                              |
| Radiation                                                       | MoK $\alpha$ ( $\lambda$ = 0.71073)                                              | CuK $\alpha$ ( $\lambda$ = 1.54178)                                             |
| 2 $\theta$ range for data collection/°                          | 4.168 to 52.21                                                                   | 4.346 to 136.472                                                                |
| Index ranges                                                    | -12 ≤ <i>h</i> ≤ 12,<br>-18 ≤ <i>k</i> ≤ 18,<br>-24 ≤ <i>l</i> ≤ 24              | -49 ≤ <i>h</i> ≤ 49,<br>-9 ≤ <i>k</i> ≤ 10,<br>-32 ≤ <i>l</i> ≤ 36              |
| Reflections collected                                           | 83699                                                                            | 61803                                                                           |
| Independent reflections                                         | 10787 [ <i>R</i> <sub>int</sub> = 0.1341,<br><i>R</i> <sub>sigma</sub> = 0.0750] | 9533 [ <i>R</i> <sub>int</sub> = 0.0856,<br><i>R</i> <sub>sigma</sub> = 0.0432] |
| Data/restraints/parameters                                      | 10787/0/717                                                                      | 9533/0/667                                                                      |
| Goodness-of-fit on F <sup>2</sup>                               | 1.040                                                                            | 1.027                                                                           |
| Final <i>R</i> indexes<br>[ <i>I</i> ≥ 2 $\sigma$ ( <i>I</i> )] | <i>R</i> <sub>1</sub> = 0.0690, <i>wR</i> <sub>2</sub> = 0.1461                  | <i>R</i> <sub>1</sub> = 0.0531, <i>wR</i> <sub>2</sub> = 0.1340                 |
| Final <i>R</i> indexes<br>[all data]                            | <i>R</i> <sub>1</sub> = 0.1352, <i>wR</i> <sub>2</sub> = 0.1719                  | <i>R</i> <sub>1</sub> = 0.0687, <i>wR</i> <sub>2</sub> = 0.1432                 |
| Largest diff. peak/hole / e Å <sup>-3</sup>                     | 0.64/-0.60                                                                       | 0.66/-0.35                                                                      |

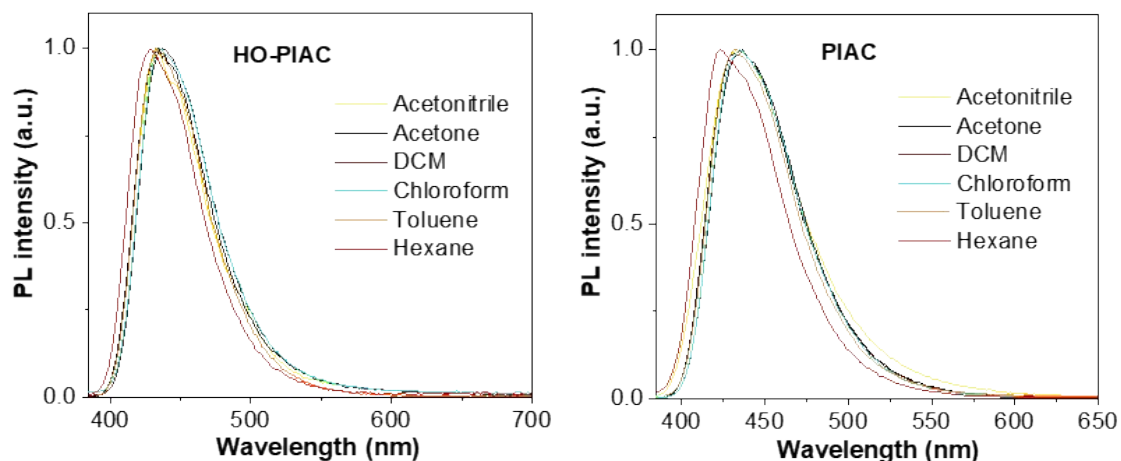

Fig .S1 Normalized PL spectra in varying solvents.

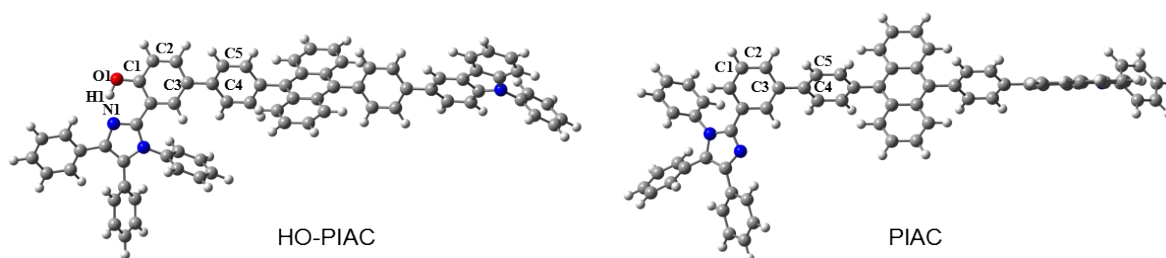

Fig. S2  $S_0$  optimized geometries of enol forms computed at B3LYP/6-31G(d,p) level.

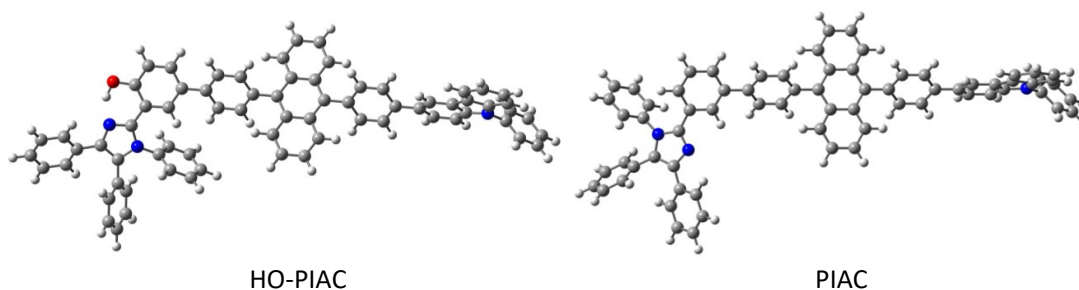

Fig. S3  $S_1$  optimized geometries of enol forms computed at B3LYP/6-31G(d,p) level.

**Table S2** Summary of relative proton transfer barriers and computed energy differences between the enol and keto forms ( $\Delta E = E_{\text{keto}} - E_{\text{enol}}$ ) between  $S_0$  and  $S_1$  computed at B3LYP/ 6-31G(d,p) level.

| Molecule | PT barrier (kcal/mol) |       | $\Delta E$ (kcal/mol) |       |
|----------|-----------------------|-------|-----------------------|-------|
|          | $S_0$                 | $S_1$ | $S_0$                 | $S_1$ |
| HO-PIAC  | 11.75                 | 5.93  | 10.62                 | 4.04  |

**Table S3** Selected bond lengths (Å) and torsional angles (°) at S<sub>0</sub> and S<sub>1</sub> optimized geometries computed at B3LYP/6-31G(d,p) and TD-B3LYP/6-31G(d,p) levels, respectively.

| Molecule | State          | Enol form    |         |       |                     | Keto form    |       |       |                     |
|----------|----------------|--------------|---------|-------|---------------------|--------------|-------|-------|---------------------|
|          |                | Distance (Å) |         |       | Torsional angle (°) | Distance (Å) |       |       | Torsional angle (°) |
|          |                | O1-H1        | N1...H1 | C3-C4 | C2C3C4C5            | O1...H1      | N1-H1 | C3-C4 | C2C3C4C5            |
| HO-PIAC  | S <sub>0</sub> | 0.996        | 1.697   | 1.483 | 36.06               | 1.552        | 1.035 | 1.480 | 33.46               |
|          | S <sub>1</sub> | 0.999        | 1.681   | 1.473 | 28.92               | 1.695        | 1.035 | 1.467 | 29.02               |
| PIAC     | S <sub>0</sub> | -            | -       | 1.485 | 36.48               | -            | -     | -     | -                   |
|          | S <sub>1</sub> | -            | -       | 1.479 | 30.96               | -            | -     | -     | -                   |

**Table S4** Simulated enol absorption maximum wavelengths ( $\lambda_{\text{abs}}$ ), enol and keto emission maximum wavelengths ( $\lambda_{\text{em}}$ ), oscillator strength (f), molecular orbitals (MOs) contribution, and Stokes shift calculated by TD-B3LYP/6-31G(d,p) level.

|         | Absorption                  |        |                   | Emission                   |                            | Stokes shift (nm) |
|---------|-----------------------------|--------|-------------------|----------------------------|----------------------------|-------------------|
|         | Enol                        |        |                   | Enol                       | Keto                       |                   |
|         | $\lambda_{\text{abs}}$ (nm) | f      | MOs Contribution  | $\lambda_{\text{em}}$ (nm) | $\lambda_{\text{em}}$ (nm) |                   |
| HO-PIAC | 399                         | 0.3927 | HOMO → LUMO (97%) | 499                        | 549                        | 150               |
| PIAC    | 396                         | 0.3582 | HOMO → LUMO (97%) | 494                        | -                          | 98                |

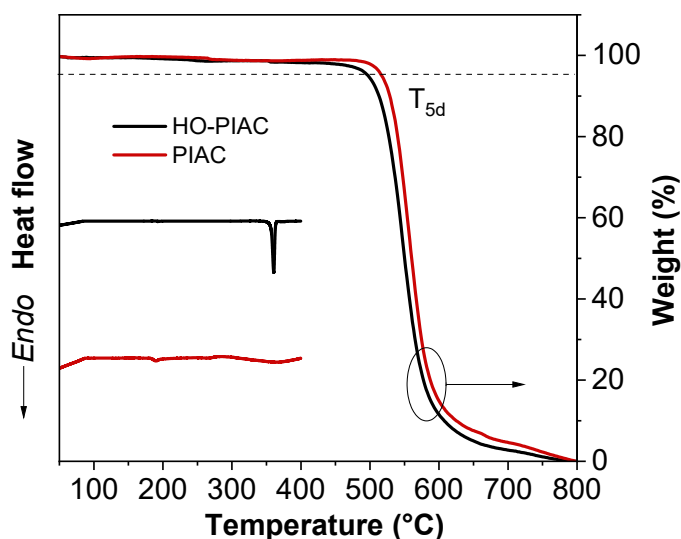

**Fig. S4** DSC and TGA thermograms analyzed at a heating rate of 10°C min<sup>-1</sup> under N<sub>2</sub> flow.

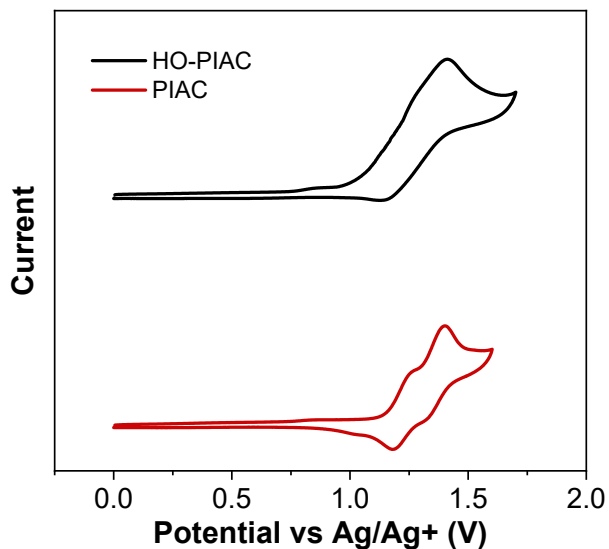

**Fig. S5** Cyclic voltammograms recorded in dry dichloromethane containing  $n\text{-Bu}_4\text{NPF}_6$  at a scan rate of 50  $\text{mV s}^{-1}$  under argon atmosphere.

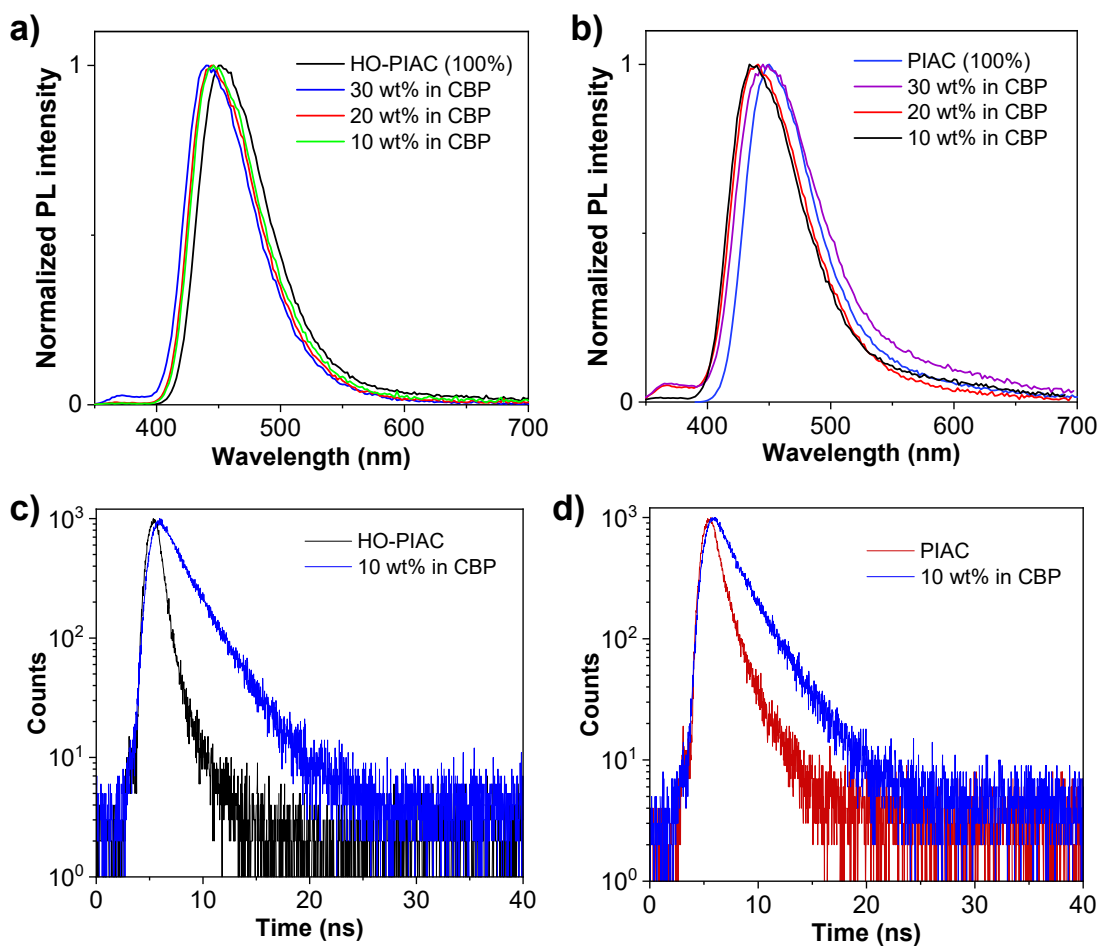

**Fig. S6** a) and b) PL spectra and c) and d) transient PL decay spectra in neat films and doped (10, 20, 30 wt% doped CBP thin films.

**Table S5** Photoluminescent properties of doped films in various conditions.

|                     | HO-PIAC (doped in CBP) |      | PIAC (doped in CBP) |      |
|---------------------|------------------------|------|---------------------|------|
|                     | neat                   | 10%  | neat                | 10%  |
| $\lambda_{em}$ (nm) | 451                    | 441  | 450                 | 437  |
| $\tau$ (ns)         | 0.70                   | 2.62 | 1.21                | 2.54 |
| $\Phi_{PL}$ (%)     | 19                     | 56   | 40                  | 57   |

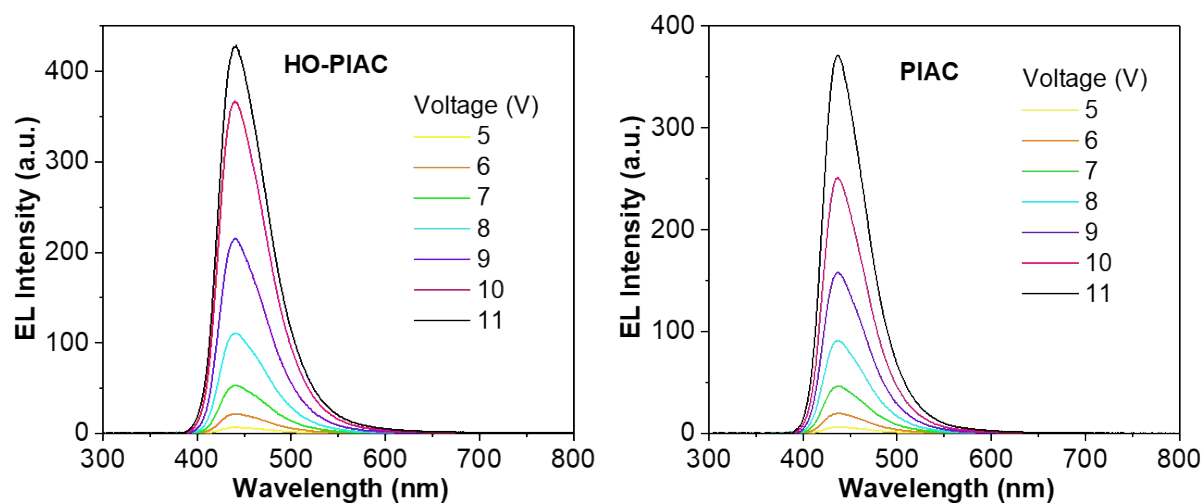

**Fig. S7** EL spectra of OLEDs at different applied voltages.

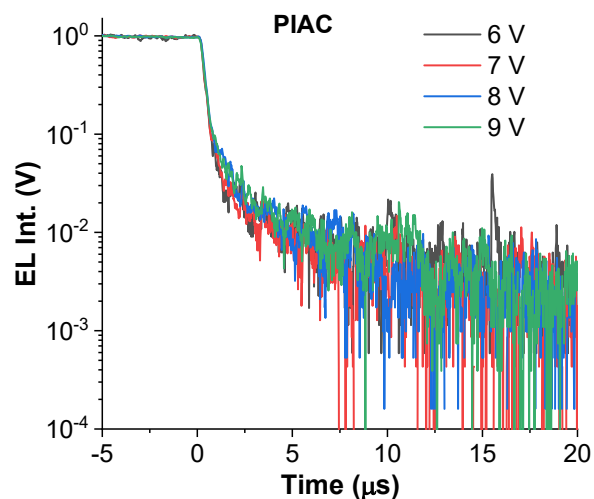

**Fig. S8** Transient EL decay of OLED device based on PIAC at different voltages.

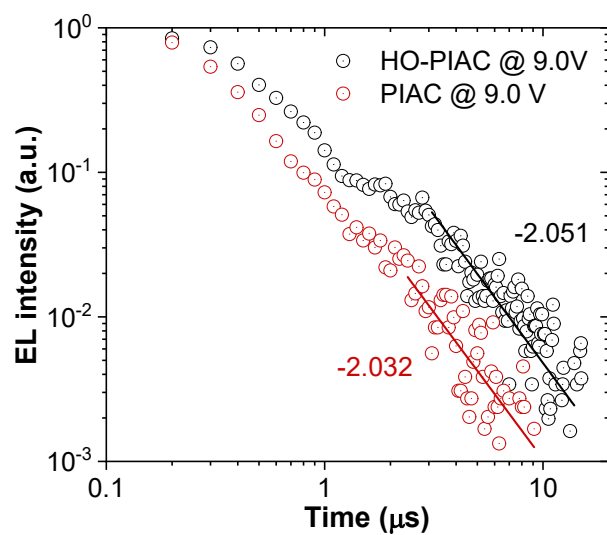

**Fig. S9** Amplified transient EL decay plots of the delayed component at a driving voltage of 10 V.



Fig. S10 Photocopies of Mass spectra, <sup>1</sup>H-NMR, and <sup>13</sup>C-NMR spectra.

Compound 2:

WL01-32-3 H  
CP\_PROTON8 CDCl3 {C:\VISTEC NMR Data\VP} vpwal 7

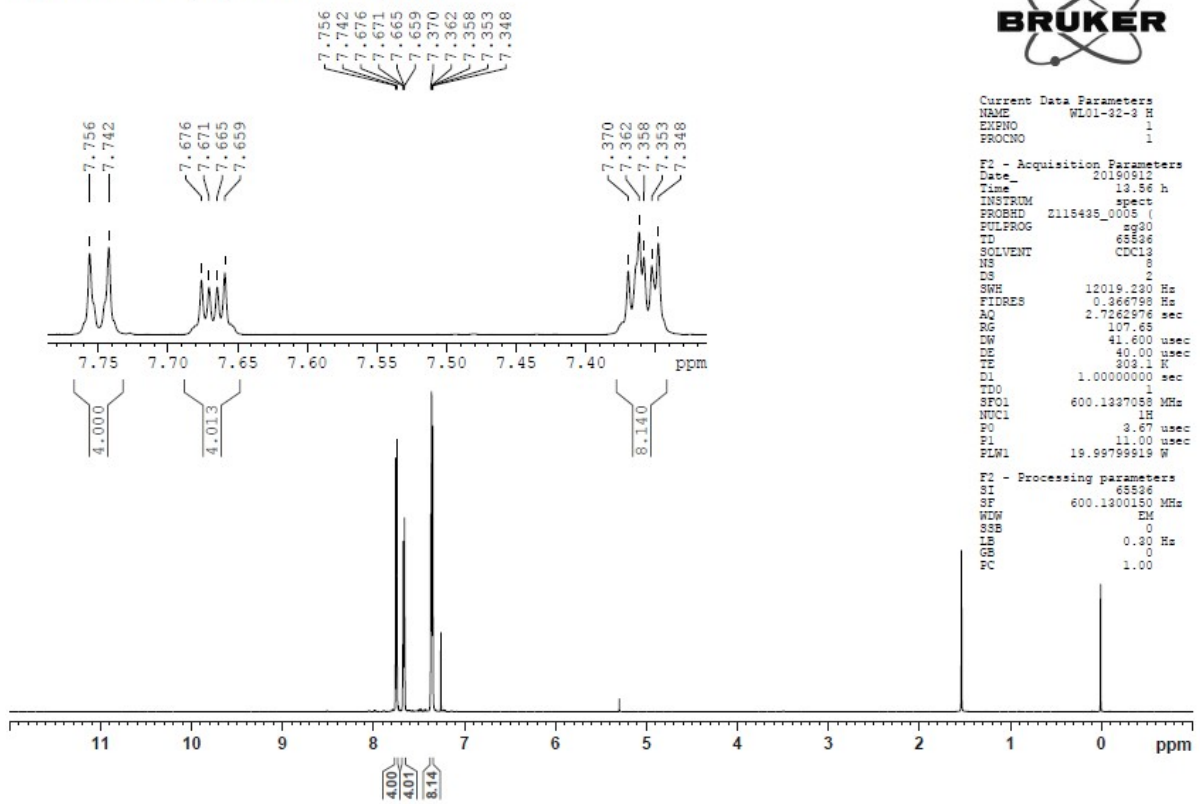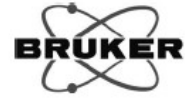

Current Data Parameters  
NAME WL01-32-3 H  
EXPNO 1  
PROCNO 1

F2 - Acquisition Parameters  
Date\_ 20190912  
Time 13.56 h  
INSTRUM spect  
PROBHD 2115495\_0005 (   
PULPROG zg30  
TD 65536  
SOLVENT CDCl3  
NS 2  
DS 2  
SWH 12019.230 Hz  
FIDRES 0.366798 Hz  
AQ 2.7262976 sec  
RG 107.65  
DM 41.600 usec  
DE 40.00 usec  
TE 303.1 K  
D1 1.00000000 sec  
TDO 1  
SFO1 600.1327058 MHz  
NUC1 1H  
FO 3.67 usec  
F1 11.00 usec  
FLW1 19.99799919 W

F2 - Processing parameters  
SI 65536  
SF 600.1300150 MHz  
WDW EM  
SSB 0  
LB 0.30 Hz  
GB 0  
PC 1.00

WL01-32-3 H 512scan  
CP\_C13CPD32\_DE12 CDC13 {C:\VISTEC NMR Data\VP} vpwal 7

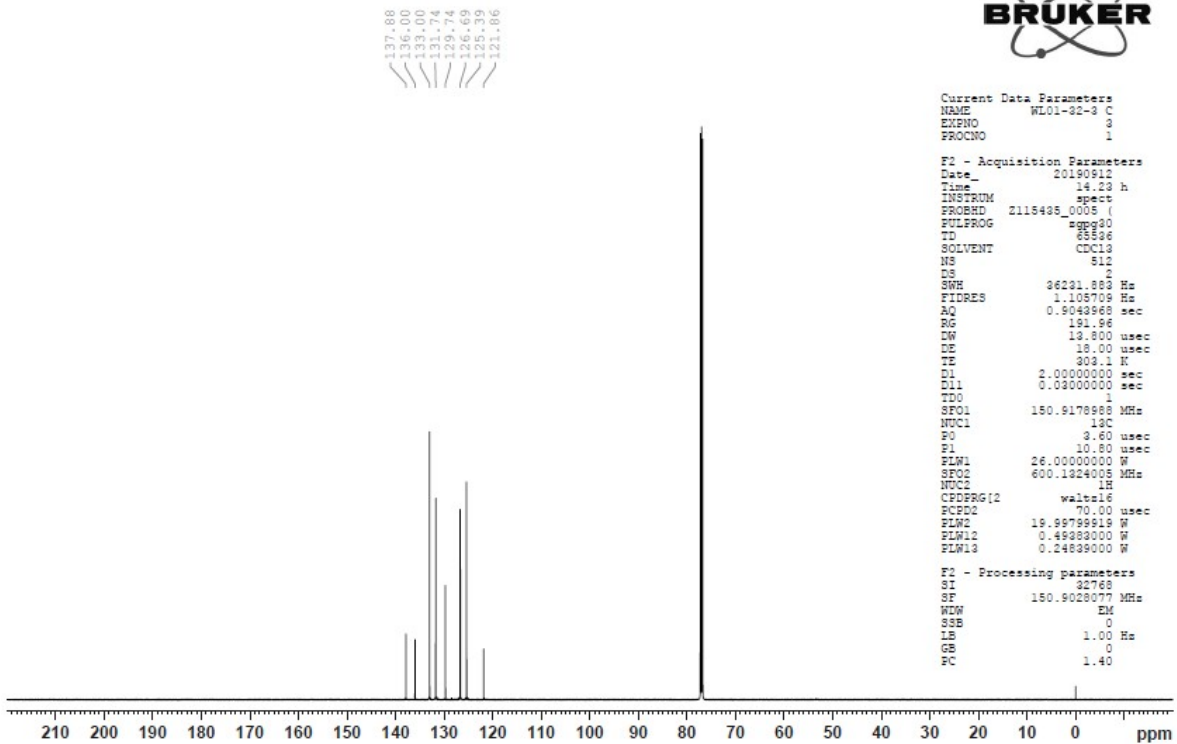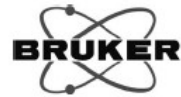

Current Data Parameters  
NAME WL01-32-3 C  
EXPNO 3  
PROCNO 1

F2 - Acquisition Parameters  
Date\_ 20190912  
Time 14.23 h  
INSTRUM spect  
PROBHD 2115495\_0005 (   
PULPROG zgpg30  
TD 65536  
SOLVENT CDCl3  
NS 2  
DS 2  
SWH 36231.883 Hz  
FIDRES 1.108709 Hz  
AQ 0.9043968 sec  
RG 121.96  
DM 13.800 usec  
DE 18.00 usec  
TE 303.1 K  
D1 2.00000000 sec  
D11 0.03000000 sec  
TDO 1  
SFO1 150.9178988 MHz  
NUC1 13C  
FO 3.60 usec  
F1 10.80 usec  
FLW1 26.00000000 W  
SFO2 600.1324005 MHz  
NUC2 1H  
CPDPRG12 waltz16  
PCPD2 70.00 usec  
FLW2 19.99799919 W  
FLW12 0.45283000 W  
FLW13 0.24639000 W

F2 - Processing parameters  
SI 32768  
SF 150.9028077 MHz  
WDW EM  
SSB 0  
LB 1.00 Hz  
GB 0  
PC 1.40

**Compound 3:**

WL01-35 H CDC13  
 CP\_PROTON8 CDC13 (C:\VISTEC NMR Data\VP) vpwal 10

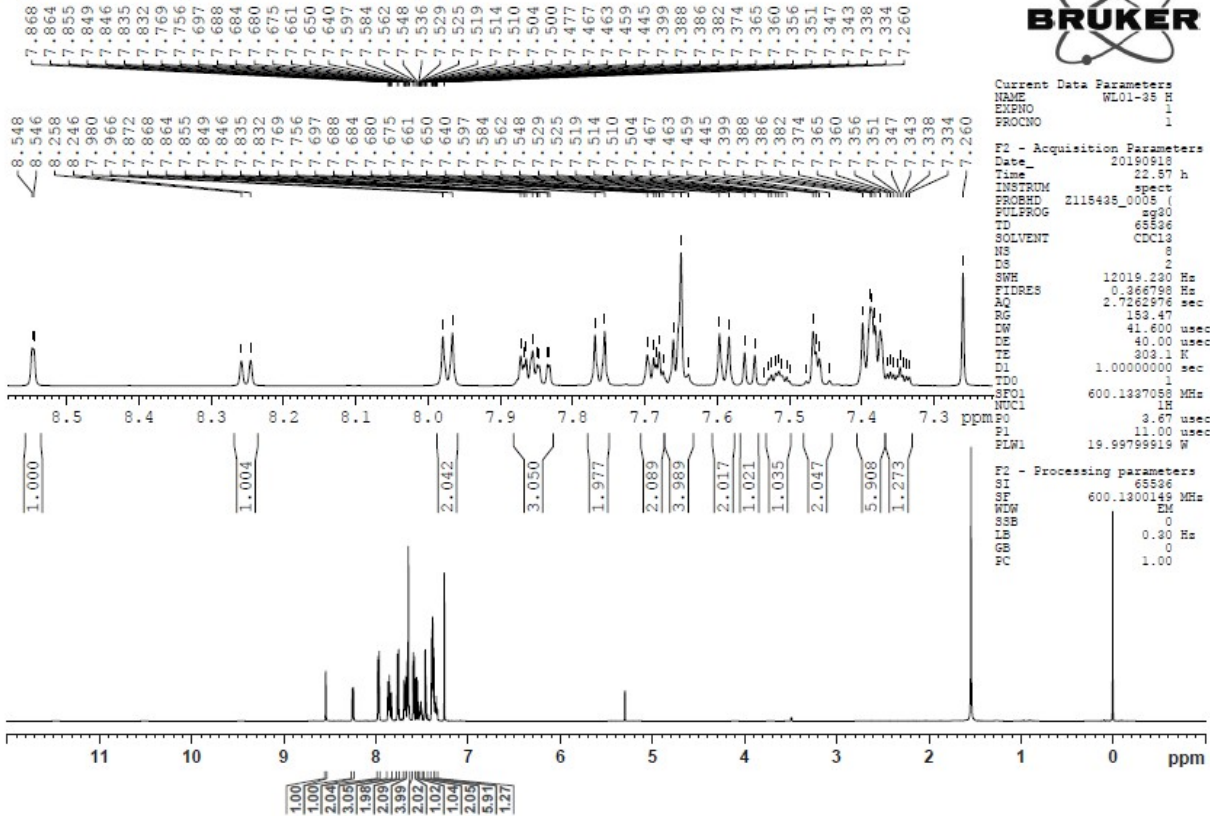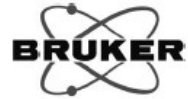

WL01-35 C 1024 CDC13  
 CP\_C13CPD32\_DE12 CDC13 (C:\VISTEC NMR Data\VP) vpwal 10

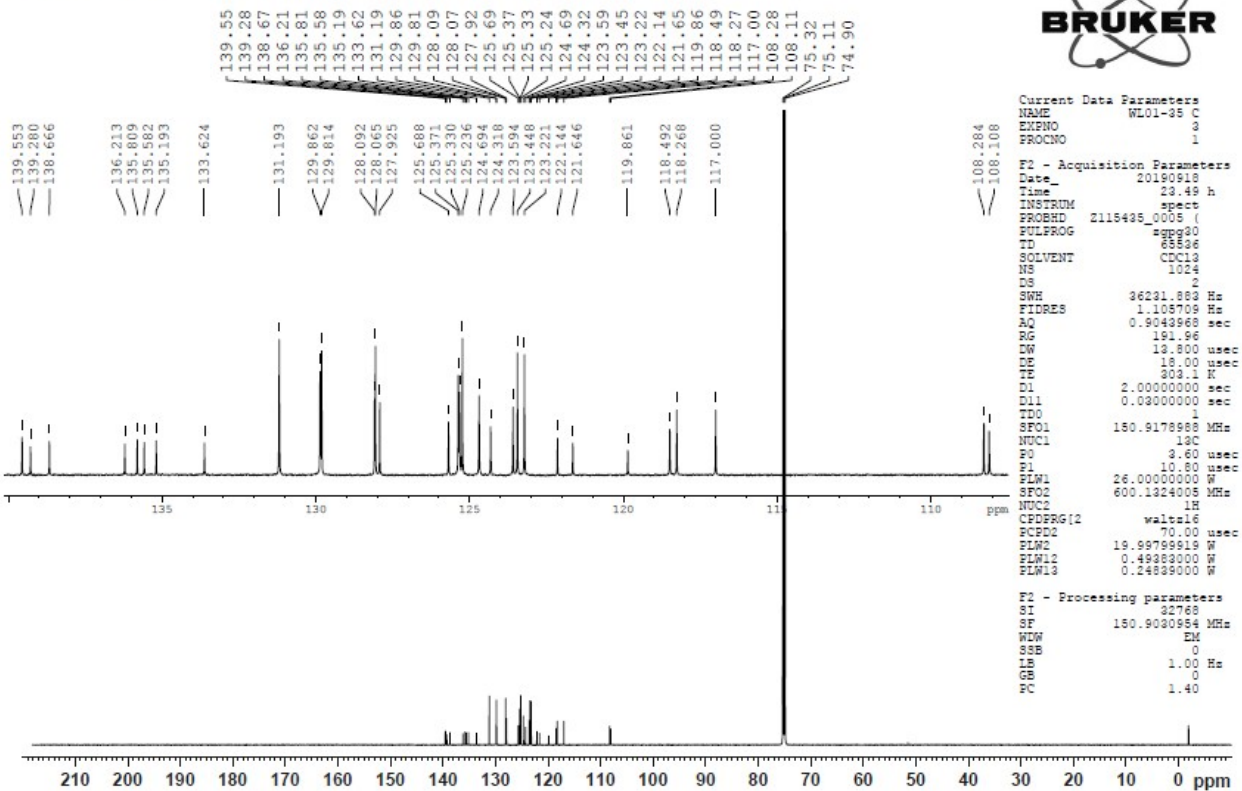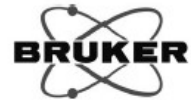

**Compound 4:**

WL01-40\_H CDC13  
 BBO\_PROTON8 CDC13 (C:\VISTEC NMR Data\VP) vpwal 10

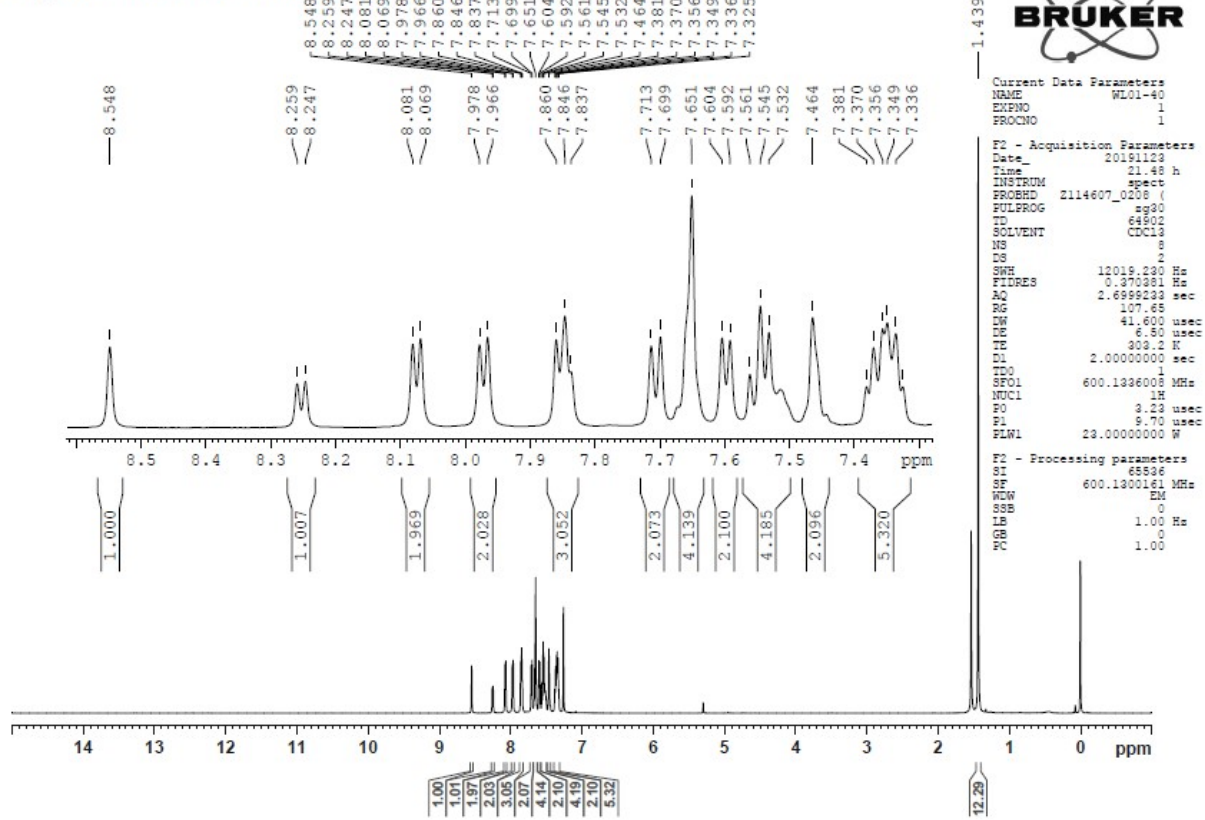

**BRUKER**

Current Data Parameters  
 NAME WL01-40  
 EXPNO 1  
 PROCNO 1

F2 - Acquisition Parameters  
 Date\_ 20191123  
 Time 21.48 h  
 INSTRUM spect  
 PROBRD E114607\_0208 ( )  
 FULPROG zgpg30  
 TD 65526  
 SOLVENT CDCl3  
 NS 2  
 DS 2  
 SWH 12015.230 Hz  
 FIDRES 0.370381 Hz  
 AQ 2.6998233 sec  
 RG 107.65  
 DW 41.600 usec  
 DE 6.50 usec  
 TE 300.2 K  
 D1 2.00000000 sec  
 TDO 1  
 SFO1 600.1336008 MHz  
 NUCL1 13C  
 FO 125.761 MHz  
 F1 9.70 usec  
 FLW1 23.00000000 W

F2 - Processing parameters  
 SI 65526  
 SF 600.1300161 MHz  
 WDW EM  
 SSB 0 Hz  
 GB 0 Hz  
 PC 1.00

WL01-40\_C 1024 CDC13  
 BBO\_C13CPD256 CDC13 (C:\VISTEC NMR Data\VP) vpwal 10

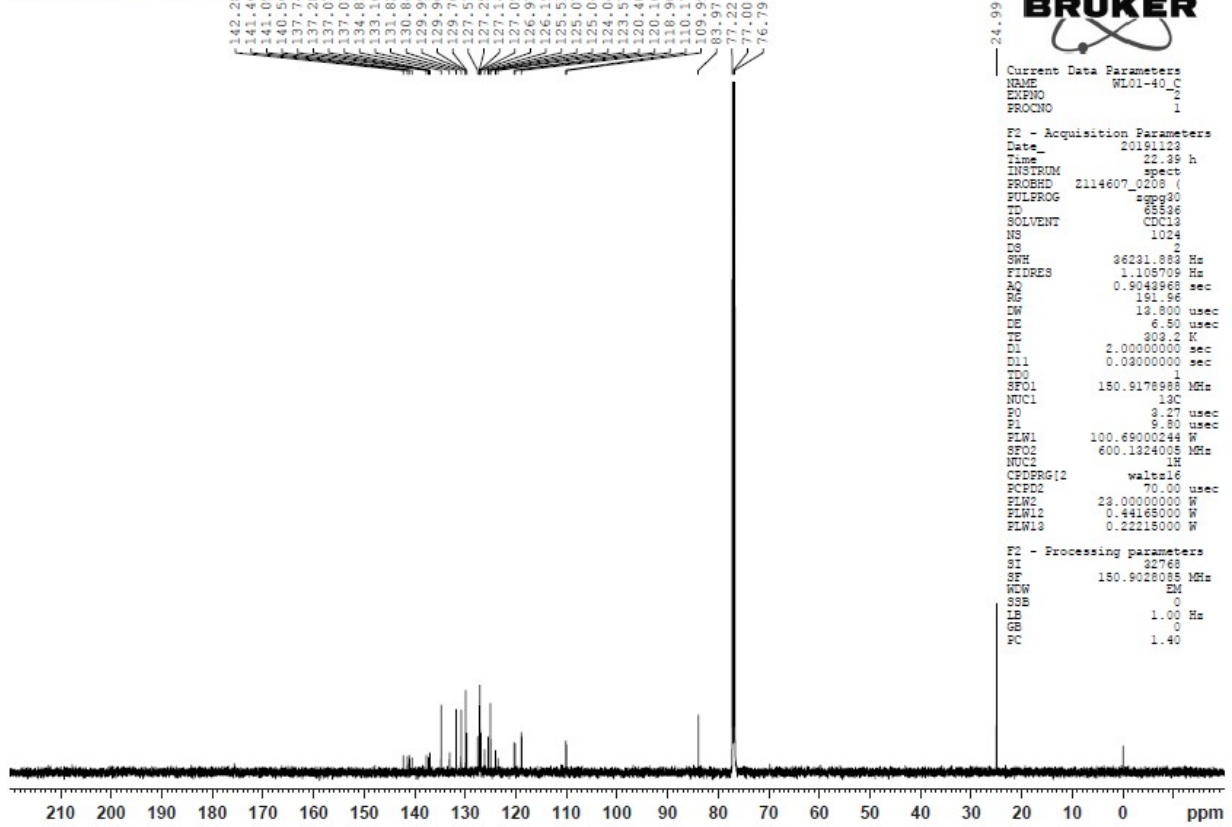

**BRUKER**

Current Data Parameters  
 NAME WL01-40\_C  
 EXPNO 1  
 PROCNO 1

F2 - Acquisition Parameters  
 Date\_ 20191123  
 Time 22.28 h  
 INSTRUM spect  
 PROBRD E114607\_0208 ( )  
 FULPROG zgpg30  
 TD 65526  
 SOLVENT CDCl3  
 NS 1024  
 DS 2  
 SWH 96231.883 Hz  
 FIDRES 1.105709 Hz  
 AQ 0.5048269 sec  
 RG 181.66  
 DW 13.800 usec  
 DE 6.50 usec  
 TE 300.2 K  
 D1 2.00000000 sec  
 TDO 0.03000000 sec  
 SFO1 150.9176988 MHz  
 NUCL1 13C  
 FO 125.761 MHz  
 F1 9.80 usec  
 FLW1 100.69000244 W  
 SFO2 600.1324005 MHz  
 NUCL2 1H  
 CDPRG12 waltz16  
 PCPD2 70.00 usec  
 FLW2 23.00000000 W  
 FLW3 0.44165000 W  
 FLW4 0.22215000 W

F2 - Processing parameters  
 SI 65526  
 SF 150.9026065 MHz  
 WDW EM  
 SSB 0 Hz  
 GB 0 Hz  
 PC 1.40

**Compound 6:**

CP\_PROTON8 CDC13 {C:\VISTEC NMR Data\VP} vpwal 11

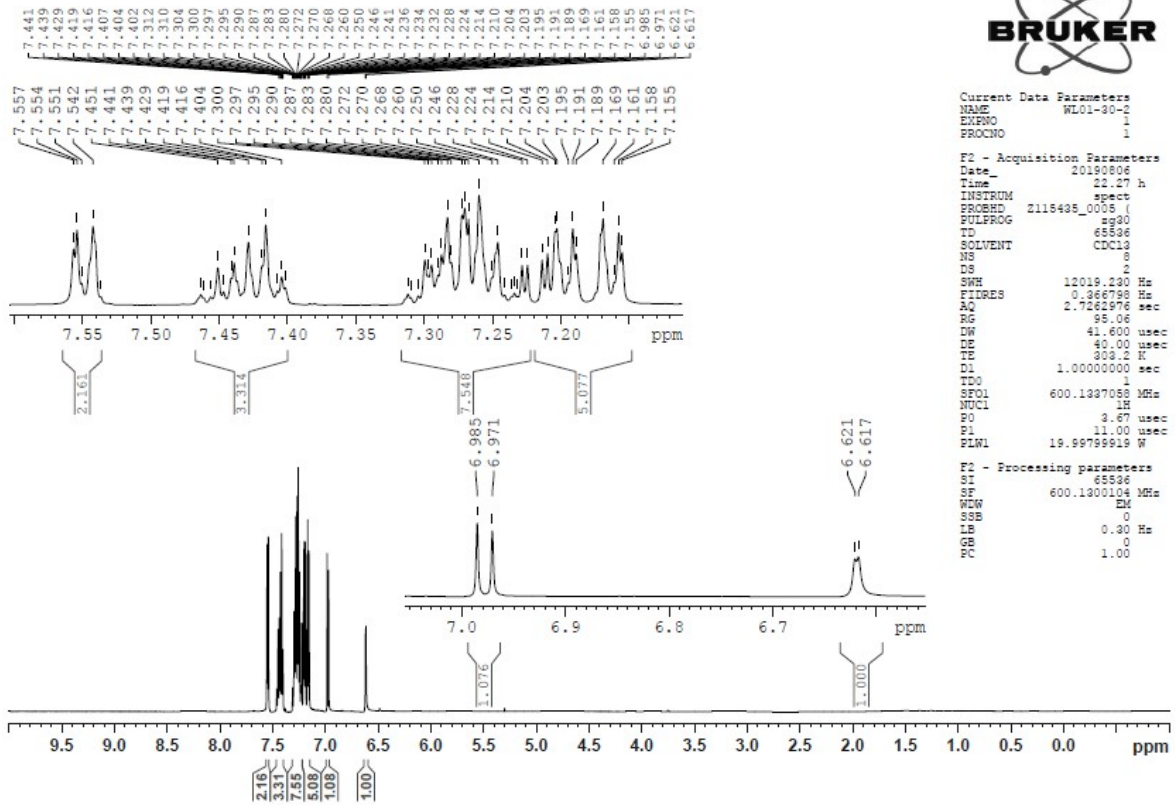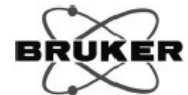

Current Data Parameters  
 NAME WL01-30-2  
 EXPNO 1  
 PROCNO 1

F2 - Acquisition Parameters  
 Date\_ 20190806  
 Time 22.27 h  
 INSTRUM spect  
 PROBHD Z115435\_0005 ( )  
 PULPROG zgpg30  
 TD 65536  
 SOLVENT CDC13  
 NS 8  
 DS 2  
 SWH 12019.230 Hz  
 FIDRES 0.346790 Hz  
 AQ 2.7482976 sec  
 RG 98.06  
 DW 41.600 usec  
 DE 40.00 usec  
 TE 303.2 K  
 DL 1.00000000 sec  
 TDO 1  
 SFO1 600.1337055 MHz  
 NUC1 1H  
 P0 3.87 usec  
 P1 11.00 usec  
 PLW1 19.99799919 W

F2 - Processing parameters  
 SI 65536  
 SF 600.1300104 MHz  
 WDW EM  
 SSB 0  
 LB 0.30 Hz  
 GB 0  
 PC 1.00

WL01-30-2 C13 1024  
 CP\_C13CPD32\_DE12 CDC13 {C:\VISTEC NMR Data\VP} vpwal 11

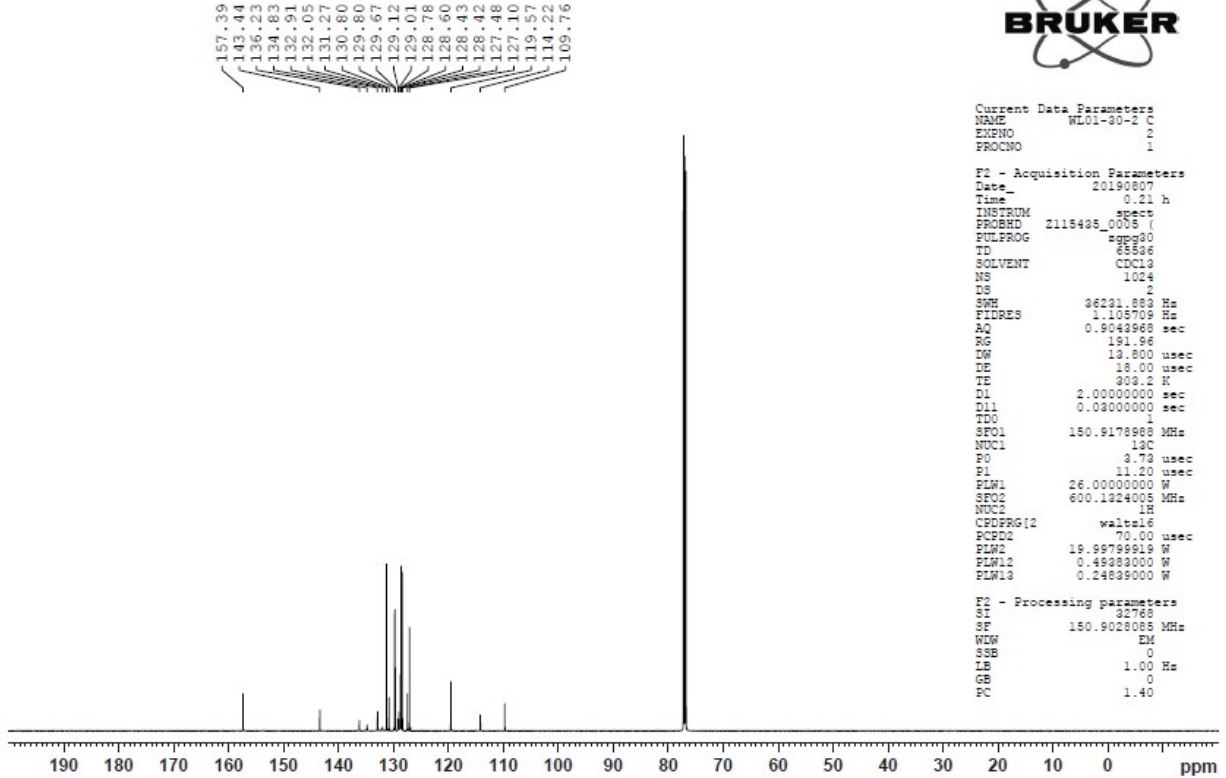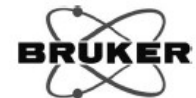

Current Data Parameters  
 NAME WL01-30-2  
 EXPNO 2  
 PROCNO 1

F2 - Acquisition Parameters  
 Date\_ 20190807  
 Time 0.21 h  
 INSTRUM spect  
 PROBHD Z115435\_0005 ( )  
 PULPROG zgpg30  
 TD 65536  
 SOLVENT CDC13  
 NS 1024  
 DS 2  
 SWH 36231.883 Hz  
 FIDRES 1.108709 Hz  
 AQ 0.904368 sec  
 RG 181.96  
 DW 13.800 usec  
 DE 18.00 usec  
 TE 303.2 K  
 DL 2.00000000 sec  
 D11 0.03000000 sec  
 TDO 1  
 SFO1 150.9178968 MHz  
 NUC1 13C  
 P0 3.73 usec  
 P1 11.20 usec  
 PLW1 26.00000000 W  
 SFO2 600.1324005 MHz  
 NUC2 1H  
 CPDPRG12 waltz16  
 PCD2 70.00 usec  
 PLW2 19.99799919 W  
 PLW12 0.49933000 W  
 PLW13 0.24839000 W

F2 - Processing parameters  
 SI 32768  
 SF 150.9028085 MHz  
 WDW EM  
 SSB 0  
 LB 1.00 Hz  
 GB 0  
 PC 1.40

Compound 7:

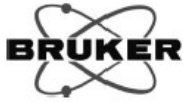

BBO\_PROTON8 CDCl3 {C:\VISTEC NMR Data\VP} vpwal 13

Current Data Parameters  
 NAME WL\_01\_48\_0807  
 EXPNO 1  
 PROCNO 1

F2 - Acquisition Parameters  
 Date\_ 20200807  
 Time 19.36 h  
 INSTRUM spect  
 PROBRD Z856701\_0011 ( )  
 PULPROG zg30  
 TD 64502  
 SOLVENT CDCl3  
 NS 2  
 DS 2  
 SWH 12019.230 Hz  
 FIDRES 0.370381 Hz  
 AQ 2.6999233 sec  
 RG 191.96  
 LW 41.600 usec  
 DE 6.80 usec  
 TE 0 K  
 DL 2.00000000 sec  
 TDO 1  
 SFO1 600.1326008 MHz  
 NUC1 1H  
 FO 4.80 usec  
 FI 13.50 usec  
 FLN1 26.00000000 W

F2 - Processing Parameters  
 SI 65536  
 SF 600.1300154 MHz  
 WDW EM  
 SSB 0  
 LB 1.00 Hz  
 GB 0  
 PC 1.00

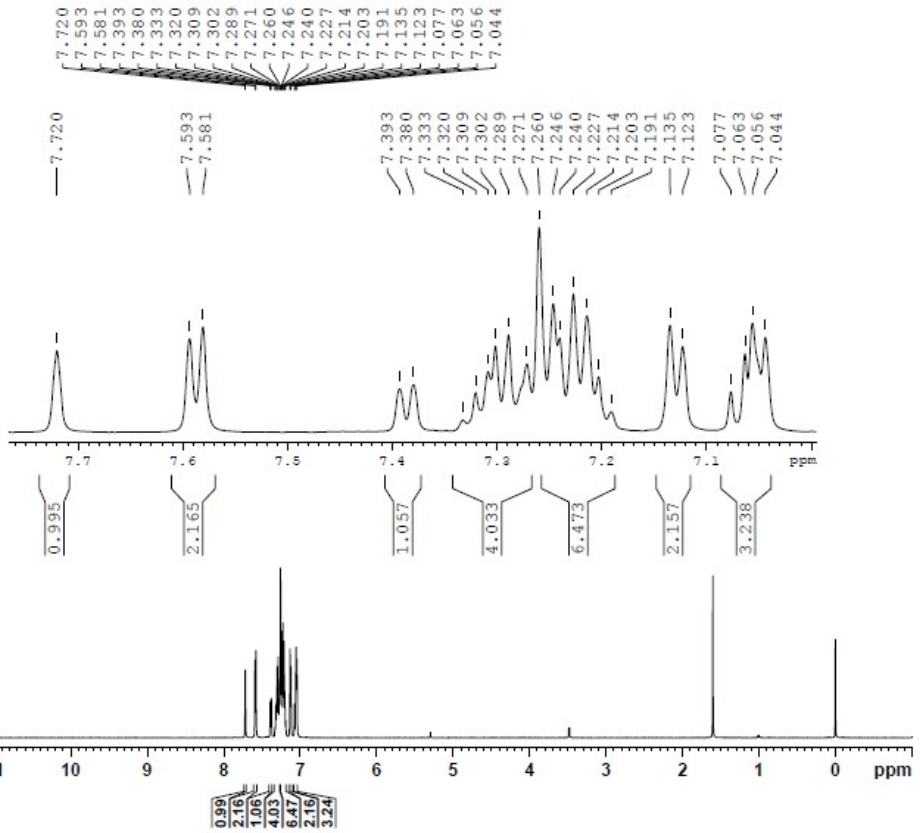

BBO\_C13CPD256 CDCl3 {C:\VISTEC NMR Data\VP} vpwal 13

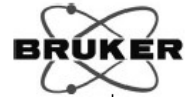

145.27  
 138.58  
 136.81  
 134.23  
 132.49  
 131.91  
 131.33  
 131.21  
 131.10  
 130.39  
 129.47  
 129.25  
 128.58  
 128.40  
 128.38  
 128.22  
 128.12  
 127.38  
 127.17  
 126.76  
 122.29

Current Data Parameters  
 NAME WL\_01\_48\_0807\_C  
 EXPNO 2  
 PROCNO 1

F2 - Acquisition Parameters  
 Date\_ 20200807  
 Time 20.37 h  
 INSTRUM spect  
 PROBRD Z856701\_0011 ( )  
 PULPROG zgpg30  
 TD 65536  
 SOLVENT CDCl3  
 NS 256  
 DS 2  
 SWH 36231.883 Hz  
 FIDRES 1.108709 Hz  
 AQ 0.9043968 sec  
 RG 191.96  
 LW 41.600 usec  
 DE 6.80 usec  
 TE 0 K  
 DL 2.00000000 sec  
 D11 0.03000000 sec  
 TDO 1  
 SFO1 150.9178988 MHz  
 NUC1 13C  
 FO 3.00 usec  
 FI 9.00 usec  
 FLN1 67.69999695 W  
 SFO2 600.1324005 MHz  
 NUC2 1H  
 CPDPRG12 waltz16  
 PCPD2 70.00 usec  
 PLN2 26.00000000 W  
 FLN12 0.96704000 W  
 FLN13 0.48640999 W

F2 - Processing Parameters  
 SI 32768  
 SF 150.9028065 MHz  
 WDW EM  
 SSB 0  
 LB 1.00 Hz  
 GB 0  
 PC 1.40

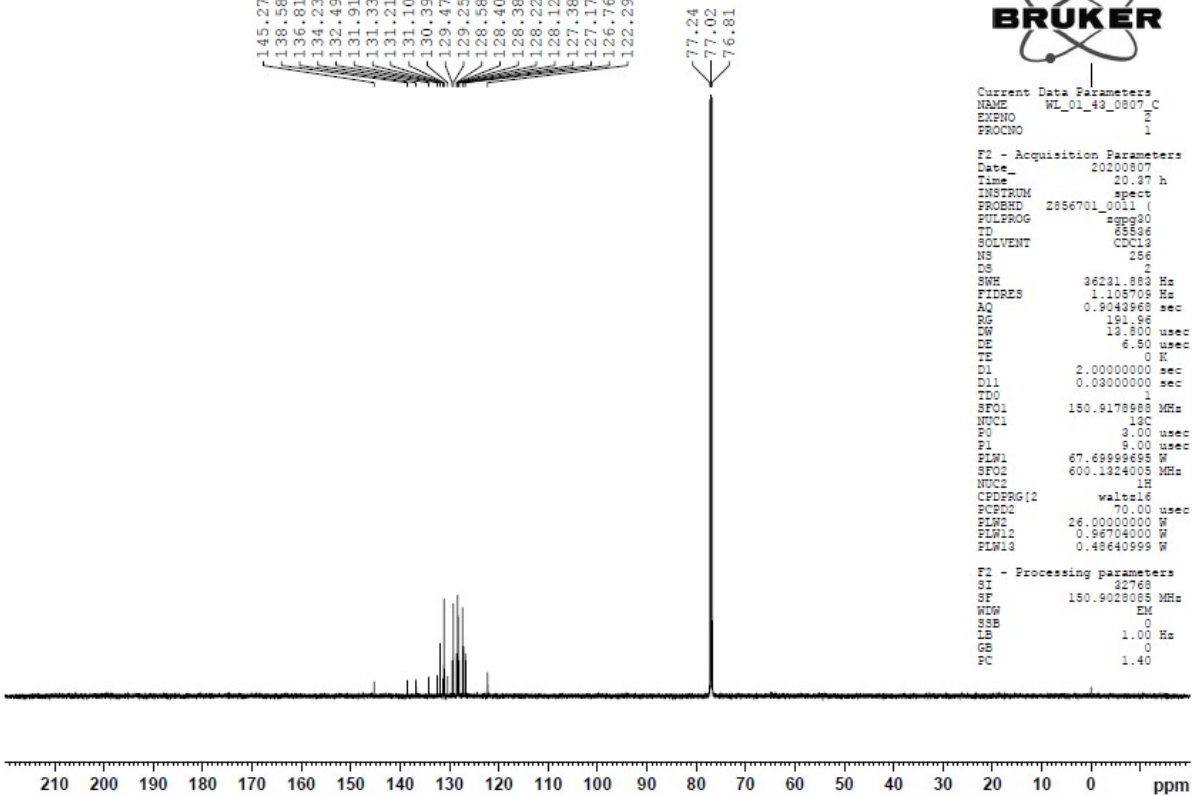

HO-PIAC:

Q-ToF MS Report | Frontier Research Center@VISTEC

Analysis Info

Analysis Name D:\Data\VISTEC Data QTOF\Vinich\Li Wan\WL01-38\_final.d  
 Method APCI\_DirectProbe.m  
 Sample Name WL01-38\_final  
 Comment m/z957.37

Acquisition Date 11/19/2019 7:26:07 PM  
 Operator VISTEC  
 Instrument compact 8255754.20068

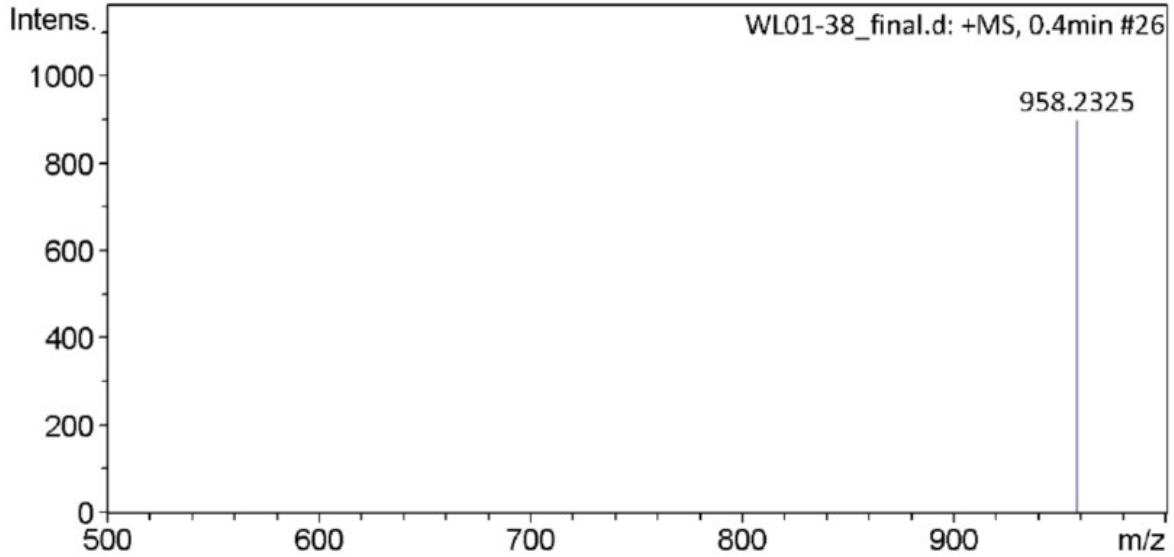

BBO\_PROTON6 CDC13 (C:\VISTEC NMR Data\VP) vpwal 14

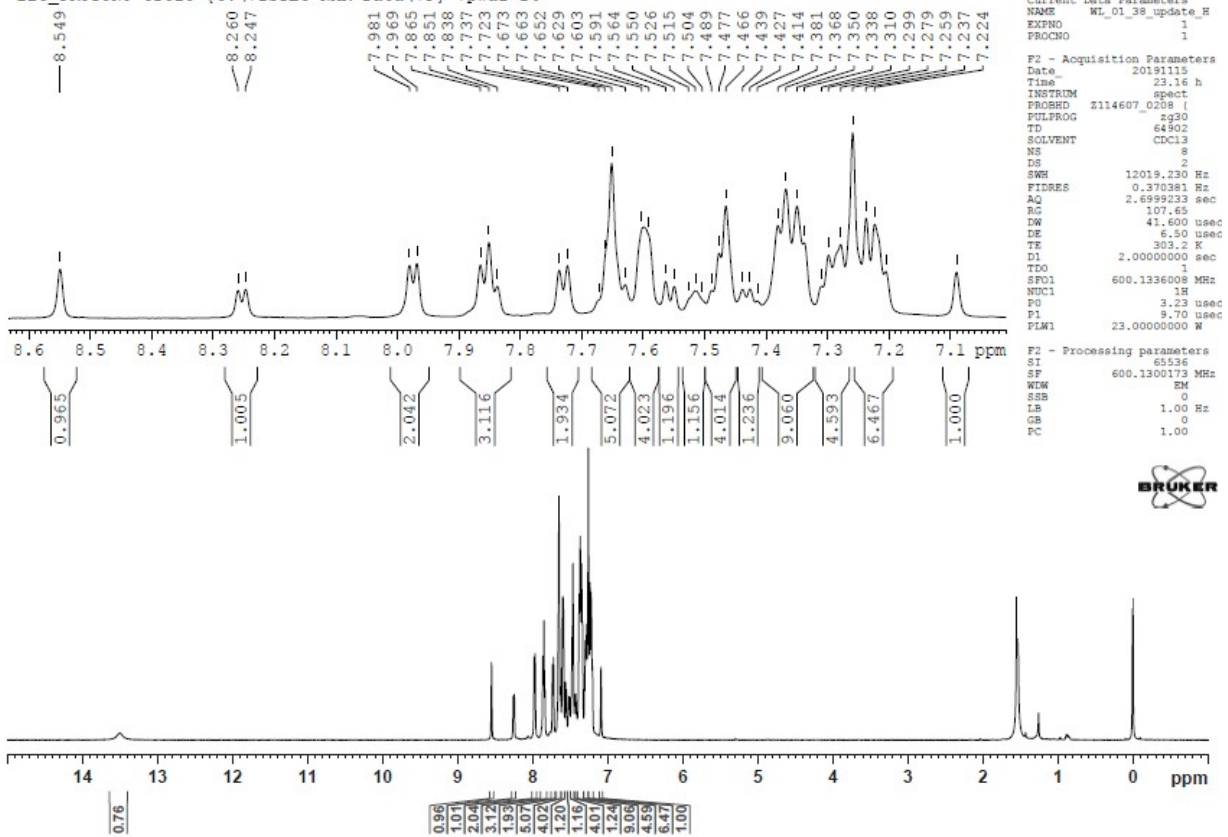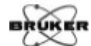

WL\_01\_38 update C 2048s CDC13  
 BBO\_C13CPD256 CDC13 (C:\VISTEC NMR Data\VP1\vpwal\_14

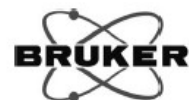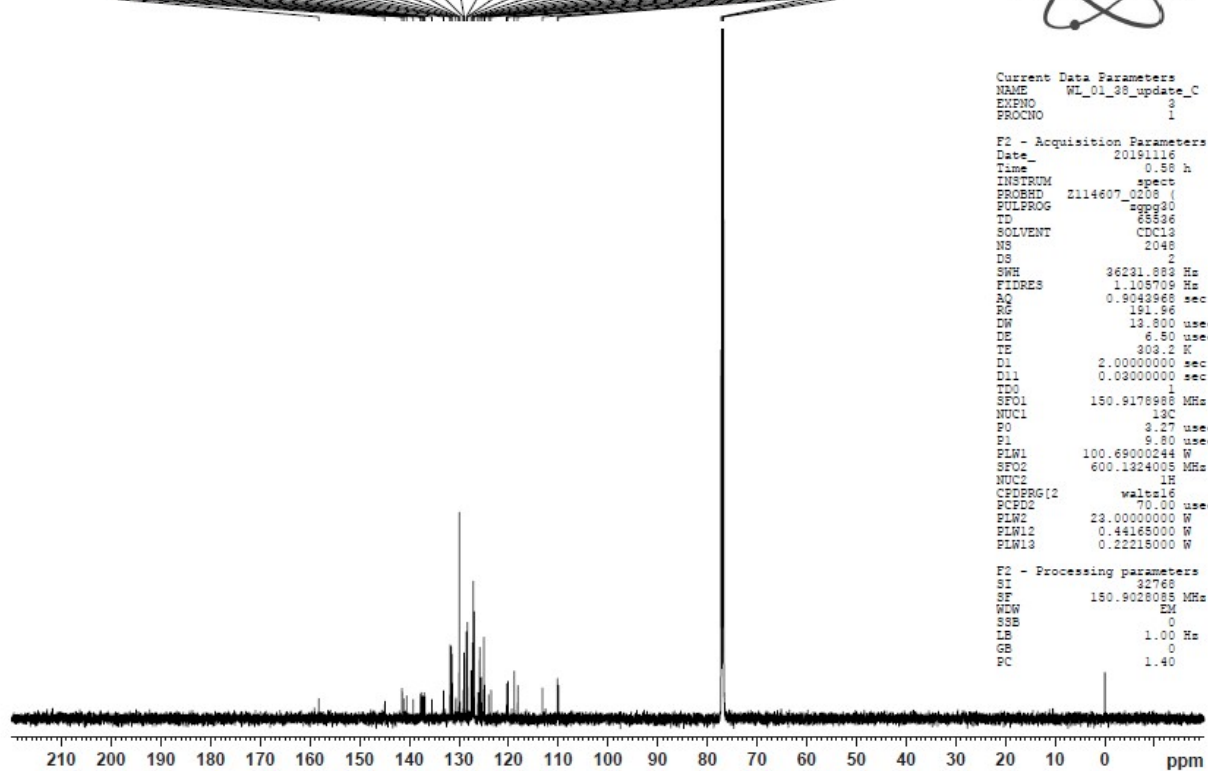

**PIAC:**

D:\Data\MSE\VIP\_LAB\Wan Li\WL01-45\_final\0\_G19\1\1SRef

**MALDI-TOF-MS Report**

Frontier Research Center, Vidyasirimedhi Institute of Science and Technology

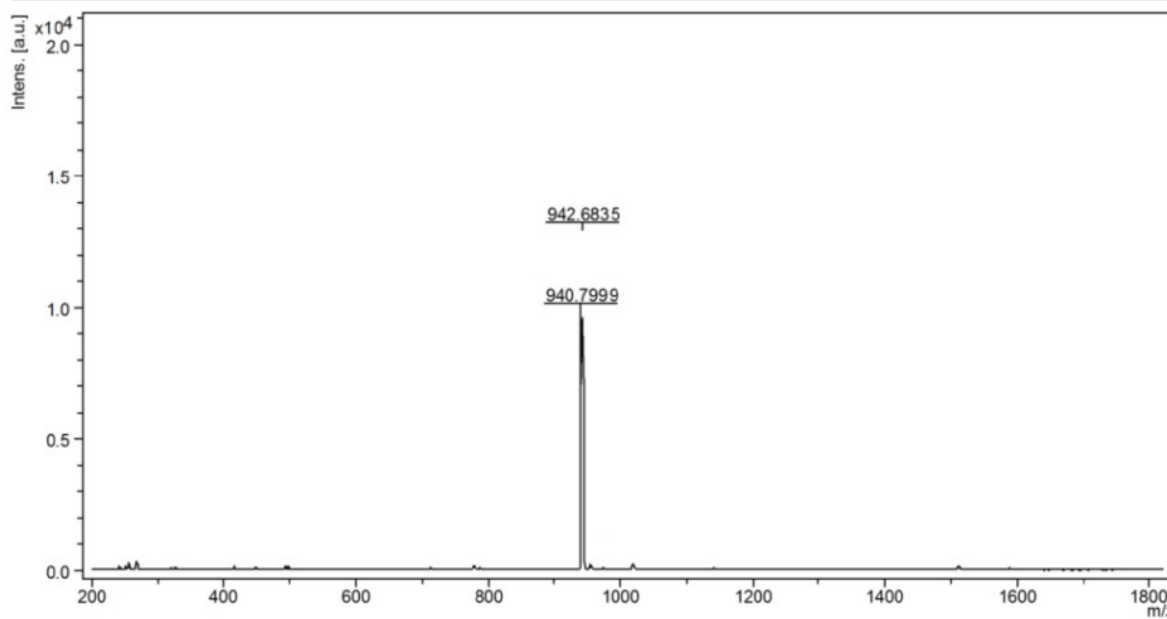

8.556  
8.285  
8.232  
7.987  
7.974  
7.877  
7.874  
7.861  
7.840  
7.837  
7.771  
7.759  
7.755  
7.699  
7.686  
7.669  
7.663  
7.654  
7.615  
7.611  
7.602  
7.597  
7.589  
7.555  
7.538  
7.517  
7.504  
7.482  
7.471  
7.462  
7.448  
7.434  
7.422  
7.409  
7.400  
7.390  
7.383  
7.376  
7.364  
7.360  
7.351  
7.347  
7.343  
7.295  
7.283  
7.267  
7.255  
7.245  
7.229  
7.217  
7.198  
7.187  
7.185  
7.179  
7.173  
7.167  
7.164

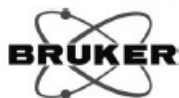

Current Data Parameters  
 NAME WL01-45  
 EXPNO 1  
 PROCNO 1

F2 - Acquisition Parameters  
 Date\_ 20200824  
 Time\_ 21.09 h  
 INSTRUM spect  
 PROBHD 2856701\_0011 ( )  
 PULPROG zg30  
 TD 64902  
 SOLVENT CDC13  
 NS 8  
 DS 2  
 SWH 12019.230 Hz  
 FIDRES 0.370381 Hz  
 AQ 2.6999233 sec  
 RG 191.96  
 DW 41.600 usec  
 DE 6.50 usec  
 TE 0 K  
 D1 2.00000000 sec  
 TDO 1  
 SFO1 600.1336008 MHz  
 NUC1 13  
 PO 4.33 usec  
 P1 13.00 usec  
 PLW1 22.00000000 W

F2 - Processing parameters  
 SI 65536  
 SF 600.1330151 MHz  
 WDW EM  
 SSB 0  
 LB 1.00 Hz  
 GB 0  
 PC 1.00

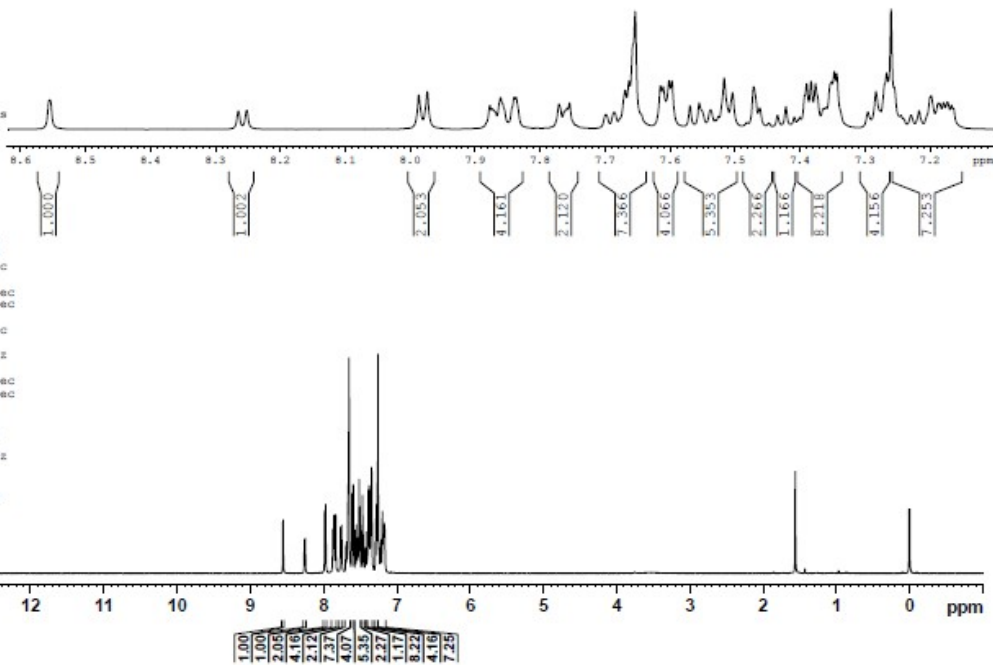

146.82  
141.44  
141.10  
140.55  
139.70  
138.44  
138.34  
137.71  
137.26  
137.09  
136.70  
136.70  
133.14  
133.03  
131.91  
131.70  
131.07  
130.03  
129.78  
129.97  
129.78  
128.67  
128.39  
128.33  
128.20  
128.03  
127.94  
127.58  
127.44  
127.27  
127.14  
127.05  
126.98  
126.89  
126.67  
126.67  
126.21  
125.52  
125.12  
125.08  
124.04  
124.04  
120.41  
120.17  
118.91  
110.19  
110.01  
77.23  
77.02  
76.81

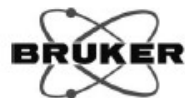

Current Data Parameters  
 NAME WL01-45 C  
 EXPNO 1  
 PROCNO 1

F2 - Acquisition Parameters  
 Date\_ 20200825  
 Time\_ 16.13 h  
 INSTRUM spect  
 PROBHD 2856701\_0011 ( )  
 PULPROG zgpg30  
 TD 65536  
 SOLVENT CDC13  
 NS 512  
 DS 2  
 SWH 36231.883 Hz  
 FIDRES 1.105709 Hz  
 AQ 0.9043968 sec  
 RG 191.96  
 DW 13.800 usec  
 DE 6.50 usec  
 TE 0 K  
 D1 2.00000000 sec  
 D11 0.03000000 sec  
 TDO 1  
 SFO1 150.9178988 MHz  
 NUC1 13C  
 PO 2.93 usec  
 P1 8.80 usec  
 PLW1 63.00000000 W  
 SFO2 600.1324005 MHz  
 NUC2 1H  
 CPDPRG2 waltz16  
 PCPD2 70.00 usec  
 PLW2 22.00000000 W  
 PLW12 0.75878000 W  
 PLW13 0.38166001 W

F2 - Processing parameters  
 SI 32768  
 SF 150.9028085 MHz  
 WDW EM  
 SSB 0  
 LB 1.00 Hz  
 GB 0  
 PC 1.40

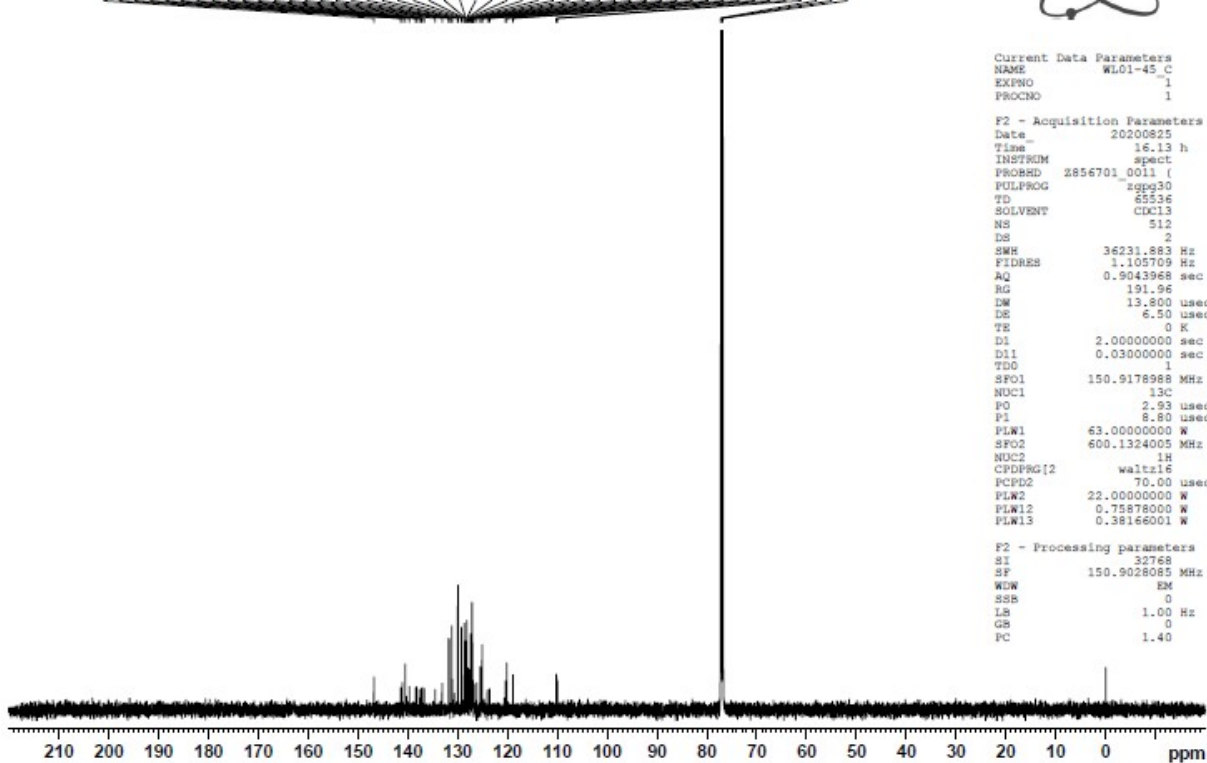

Supplement: d2tc01406h1.pdf [file d2tc01406h1.pdf]
